# Supplementary material for: High-performance 2D/3D hybrid dimensional p–n heterojunction solar cell with reduced recombination rate by an interfacial layer
Source: Royal Society of Chemistry journal article supplement (doi:10.1039/d2tc02548e), 2022-01-01
Supplement: d2tc02548e1.pdf [file d2tc02548e1.pdf]

## Supplementary Data

### **High-performance 2D/3D hybrid dimensional p-n heterojunction solar cell with reduced recombination rate by an interfacial layer**

**H.H. Hegazy<sup>1,2</sup>, Amir Muhammad Afzal<sup>3</sup>, A. Dahshan<sup>1,4</sup>, Muhammad Waqas Iqbal<sup>3</sup>, Imen  
Kebaili<sup>1,5</sup>**

<sup>1</sup> Department of Physics, Faculty of Science, King Khalid University, P.O. Box 9004, Abha, Saudi Arabia.

<sup>2</sup> Department of Physics, Faculty of Science, Al-Azhar University; 71524 Assiut ; Egypt

<sup>3</sup>Department of Physics, Riphah International University, 13 Raiwind road, Lahore, Pakistan

<sup>4</sup>Department of Physics, Faculty of Science, Port Said University, Port Said, Egypt.

<sup>5</sup>Université de Sfax, Laboratoire de Physique Appliquée, Groupe de Physique des matériaux luminescents, Faculté des Sciences de Sfax, Département de Physique, BP 1171, Université de Sfax, 3018 Sfax, Tunisie.

Corresponding author: amirafzal461@gmail.com

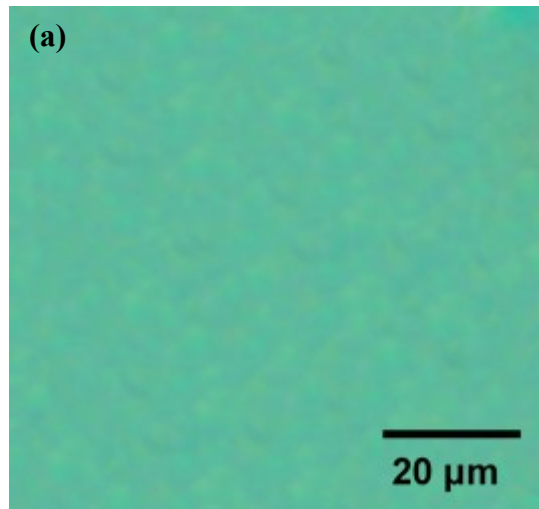

**Figure S1.** Optical image of MoS<sub>2</sub> on the surface of p-Si

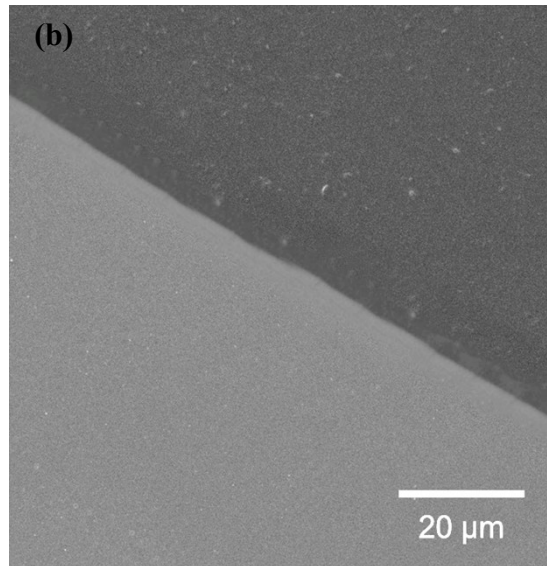

**Figure S2.** FE-SEM image of MoS<sub>2</sub> on the surface of p-Si

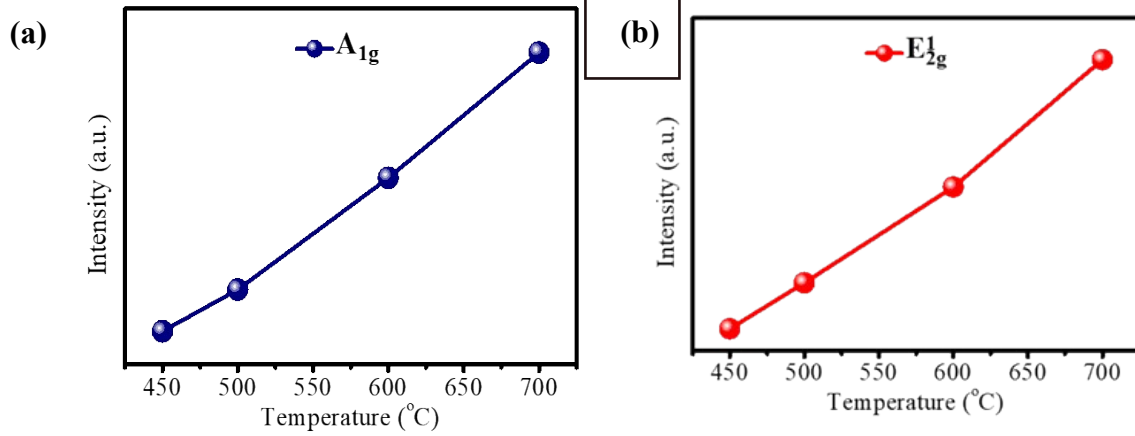

**Figure S3.** Change in Raman shift with the annealing temperatures, (a) in-plan and (b) out of plan vibration mode

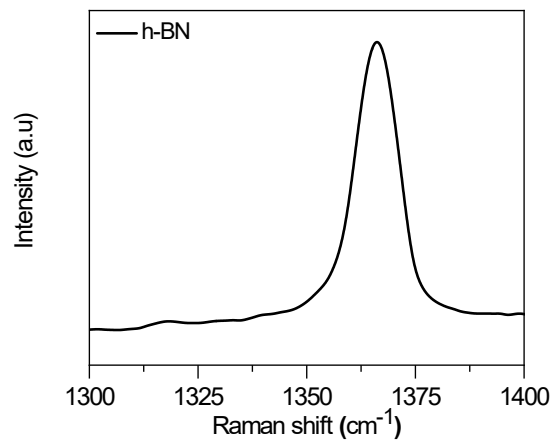

**Figure S4.** Raman spectroscopy measurement of h-BN

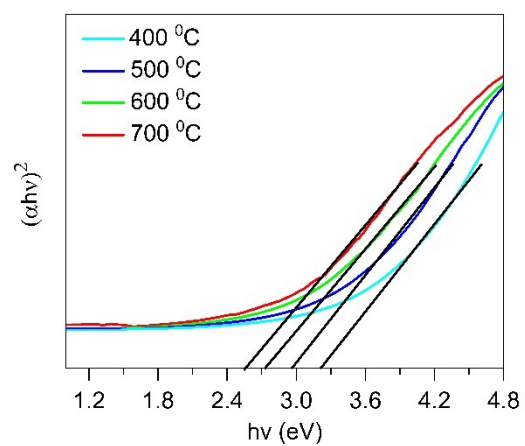

**Figure S5.** UV-Vis absorption spectrum of few-layered MoS<sub>2</sub> flakes at different temperatures

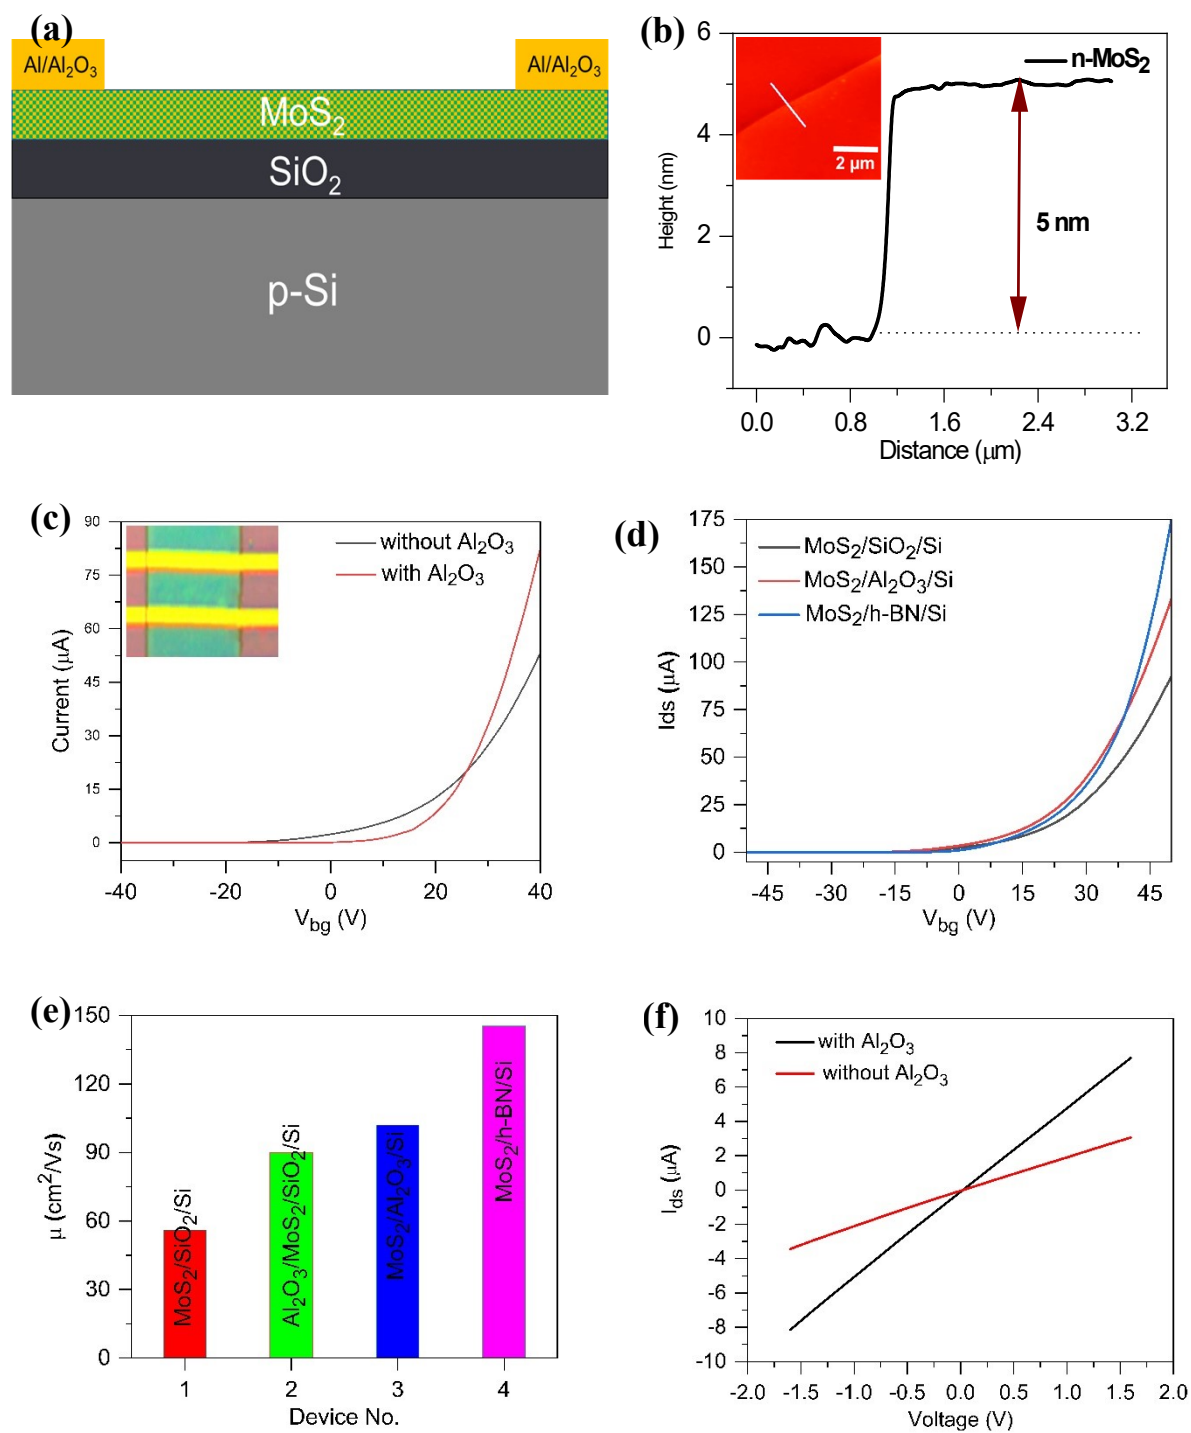

**Figure S6.** (a) Schematic diagram of MoS<sub>2</sub> field effect transistor with Al<sub>2</sub>O<sub>3</sub> as a layer between the metal electrode and MoS<sub>2</sub> junction (b) Height profile to measure the thickness of MoS<sub>2</sub> flake. The inset figure shows the atomic force microscopy image (c) Transfer curves of MoS<sub>2</sub> FET with

and with passivation of  $\text{Al}_2\text{O}_3$  (d) Transfer curves of  $\text{MoS}_2$  FETs with different interfacial layers (e) Change in mobility of  $\text{MoS}_2$  FETs with different interfacial layers and passivation (f) Current-voltage characteristics of  $\text{MoS}_2$  FETs with and without passivation of  $\text{Al}_2\text{O}_3$

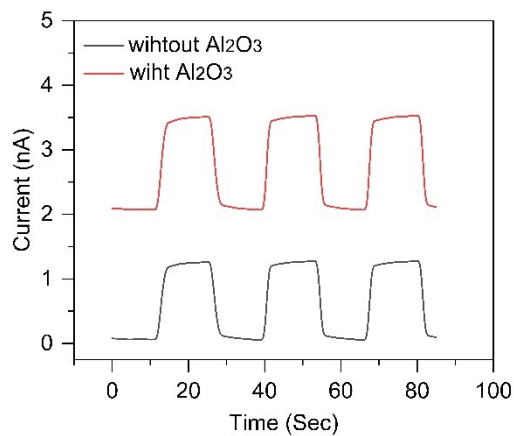

**Figure S7.** Time-dependent response to measure the effect of passivation on the generation of electron-hole pairs.

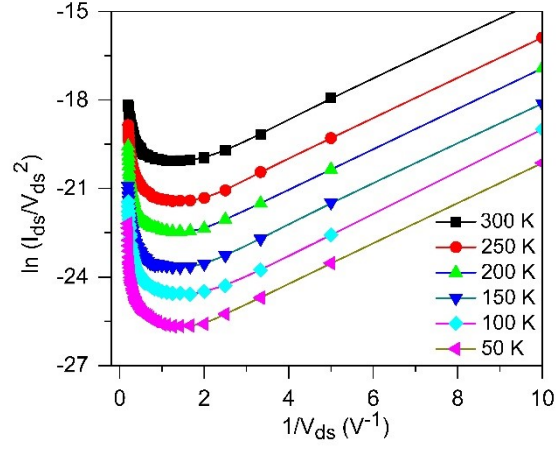

**Figure S8.**  $\ln(I/V^2)$  vs.  $1/V$  plots reconfigured from current-voltage curves which were measured at different temperatures.

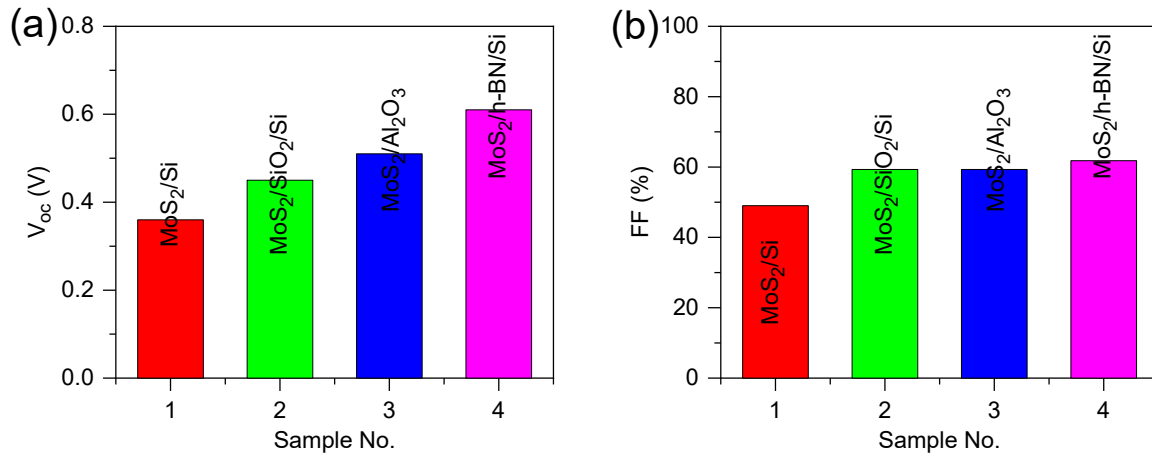

**Figure S9.** Change in (a)  $V_{oc}$  (b) FF
